# Supplementary material for: Transcriptome, Proteome, Histology, and Biochemistry Analysis of Oriental River Prawn Macrobrachium nipponense under Long-term Salinity Exposure
Source: Frontiers journal article supplement (doi:10.3389/fmars.2022.1104984), 2023-02-08
Supplement: Table_2.docx [file Table_2.docx]

Supplementary Table. 2. Summary of RNA sequencing data of three tissues in *M. nipponense* under different salinity gradients.

| **Sample** | **Raw Reads/M** | **Raw Bases/G** | **Clean Reads/M** | **Clean Bases/G** | **Valid Bases** | **Q30** | **GC** |
| --- | --- | --- | --- | --- | --- | --- | --- |
| **0ppt-G** | 147.05 | 22.06 | 144.47 | 21.07 | 95.50% | 93.89% | 44.63% |
| **7ppt-G** | 148.49 | 22.27 | 145.54 | 21.16 | 95.02% | 93.62% | 44.03% |
| **14ppt-G** | 150.62 | 22.6 | 147.97 | 21.58 | 95.54% | 93.75% | 43.71% |
| **21ppt-G** | 145.49 | 21.82 | 142.72 | 20.73 | 94.99% | 92.57% | 1516.74% |
| **0ppt-He** | 144.21 | 21.63 | 141.81 | 20.69 | 95.68% | 94.17% | 45.57% |
| **7ppt-He** | 150.54 | 22.58 | 148.1 | 21.57 | 95.53% | 93.72% | 45.58% |
| **14ppt-He** | 148.99 | 22.35 | 146.37 | 21.29 | 95.25% | 93.75% | 45.78% |
| **21ppt-He** | 144.96 | 21.75 | 142.27 | 20.77 | 95.53% | 93.41% | 45.49% |
| **0ppt-M** | 149.62 | 22.45 | 147.11 | 21.47 | 95.66% | 92.82% | 50.60% |
| **7ppt-M** | 148.45 | 22.26 | 145.68 | 21.22 | 95.33% | 93.70% | 50.01% |
| **14ppt-M** | 149.9 | 22.49 | 147.18 | 21.48 | 95.52% | 93.51% | 49.72% |
| **21ppt-M** | 152.75 | 22.91 | 149.89 | 21.83 | 95.30% | 93.38% | 50.05% |
